# Supplementary material for: A Deep Learning Approach with Data Augmentation to Predict Novel Spider Neurotoxic Peptides
Source: MDPI journal article supplement (doi:10.3390/ijms222212291), 2021-11-13
Supplement: s1 [file s1]

**Table S1.** Dataset information.

|                                            | unAUG training<br>dataset (5-fold) | Test dataset<br>(5-fold) | AUG training<br>dataset | Simulation<br>dataset |
|--------------------------------------------|------------------------------------|--------------------------|-------------------------|-----------------------|
| Neurotoxic<br>peptide data from<br>Uniprot | 692                                | 173                      | -                       | -                     |
| Augmented<br>neurotoxic peptide<br>data    | -                                  | -                        | 12,945                  | 43,150                |
| Non-neurotoxic<br>data from Uniprot        | 692                                | 173                      | 12,945                  | 43,150                |
| Total                                      | 1384                               | 346                      | 25,890                  | 86,300                |

**Table S2.** CNN model hyperparameters.

| No. | Model shape              | Convolutional layer  |             | Pooling layer |         | Fully connected layer |
|-----|--------------------------|----------------------|-------------|---------------|---------|-----------------------|
|     |                          | Filter size          | Kernel size | Pool size     | Strides | Node shape            |
| 1   | 2 conv-pool 1 dense      | 8, 16                | 3,3         | 3,3           | 2       | 300                   |
| 2   | 2 conv-conv-pool 1 dense | 8, 16                | 3,3         | 3,3           | 2       | 300                   |
| 3   | 2 conv-pool 1 dense      | 8, 16                | 5,5         | 5,5           | 2       | 300                   |
| 4   | 2 conv-conv-pool 1 dense | 8, 16                | 5,5         | 5,5           | 2       | 300                   |
| 5   | 2 conv-pool 3 dense      | 8, 16                | 3,3         | 3,3           | 2       | 500-300-100           |
| 6   | 2 conv-conv-pool 3 dense | 8, 16                | 3,3         | 3,3           | 2       | 500-300-100           |
| 7   | 2 conv-pool 3 dense      | 8, 16                | 5,5         | 5,5           | 2       | 500-300-100           |
| 8   | 2 conv-conv-pool 3 dense | 8, 16                | 5,5         | 5,5           | 2       | 500-300-100           |
| 9   | 3 conv-pool 1 dense      | 8, 16, 32            | 3,3         | 3,3           | 2       | 300                   |
| 10  | 3 conv-pool 1 dense      | 8, 16, 32            | 5,5         | 5,5           | 2       | 300                   |
| 11  | 3 conv-conv-pool 1 dense | 8, 16, 32            | 5,5         | 5,5           | 2       | 300                   |
| 12  | 3 conv-pool 3 dense      | 8, 16, 32            | 3,3         | 3,3           | 2       | 500-300-100           |
| 13  | 3 conv-pool 3 dense      | 8, 16, 32            | 5,5         | 5,5           | 2       | 500-300-100           |
| 14  | 3 conv-conv-pool 3 dense | 8, 16, 32            | 5,5         | 5,5           | 2       | 500-300-100           |
| 15  | 4 conv-pool 1 dense      | 8, 16, 32, 64        | 3,3         | 3,3           | 2       | 300                   |
| 16  | 4 conv-conv-pool 1 dense | 8, 16, 32, 64        | 3,3         | 3,3           | 2       | 300                   |
| 17  | 4 conv-pool 1 dense      | 8, 16, 32, 64        | 5,5         | 5,5           | 2       | 300                   |
| 18  | 4 conv-conv-pool 1 dense | 8, 16, 32, 64        | 5,5         | 5,5           | 2       | 300                   |
| 19  | 4 conv-pool 3 dense      | 8, 16, 32, 64        | 3,3         | 3,3           | 2       | 500-300-100           |
| 20  | 4 conv-conv-pool 3 dense | 8, 16, 32, 64        | 3,3         | 3,3           | 2       | 500-300-100           |
| 21  | 4 conv-pool 3 dense      | 8, 16, 32, 64        | 5,5         | 5,5           | 2       | 500-300-100           |
| 22  | 4 conv-conv-pool 3 dense | 8, 16, 32, 64        | 5,5         | 5,5           | 2       | 500-300-100           |
| 23  | 3 conv-conv-pool 1 dense | 8, 8, 16, 16, 32, 32 | 3,3         | 3,3           | 2       | 300                   |
| 24  | 3 conv-conv-pool 3 dense | 8, 8, 16, 16, 32, 32 | 3,3         | 3,3           | 2       | 500-300-100           |

**Table S3.** Genome statistics of *C. koreanus*.

|                               | <i>Callobius koreanus</i> |
|-------------------------------|---------------------------|
| Transcripts                   | 151,080                   |
| Number of candidate peptides  | 21,214                    |
| GC content                    | 35.15%                    |
| N50                           | 731                       |
| ORF predicted transcript      | 21,214                    |
| Number of ORF                 | 22,258                    |
| Expressed gene in body        | 15,411                    |
| Expressed gene in venom gland | 10,116                    |

**Table S4.** The predicted mature peptide region of the selected peptides.

| Name    | Mature peptide sequence                                                              |
|---------|--------------------------------------------------------------------------------------|
| c62771  | SCIRRSASCDHRPSDCCFNSSCRCNLWGTNCRCQRAGLFQKWGK                                         |
| c136163 | SEEDPPKKQRKVISQPVKEVRLDNVGHVPKFMDDKNASKRLEGC<br>KSRTRVCVKCQMYLCIMKNNCFLKYHTQ         |
| c43972  | IPIYITYAWCSCGLSKKQPFCDGSHINHPKKLQPVRFNPPKDGRFLLC<br>RCKQTNNRPYCDLSHVKTFIPESLRKALKIKL |
| c68785  | VEETTTDSTIEPSSSTTQPPPVSCGSQTCRANECCIQGRRGRRQRCSSL<br>RNWERCDRRNQPCGAGLTCRAIRRRSYCRPQ |

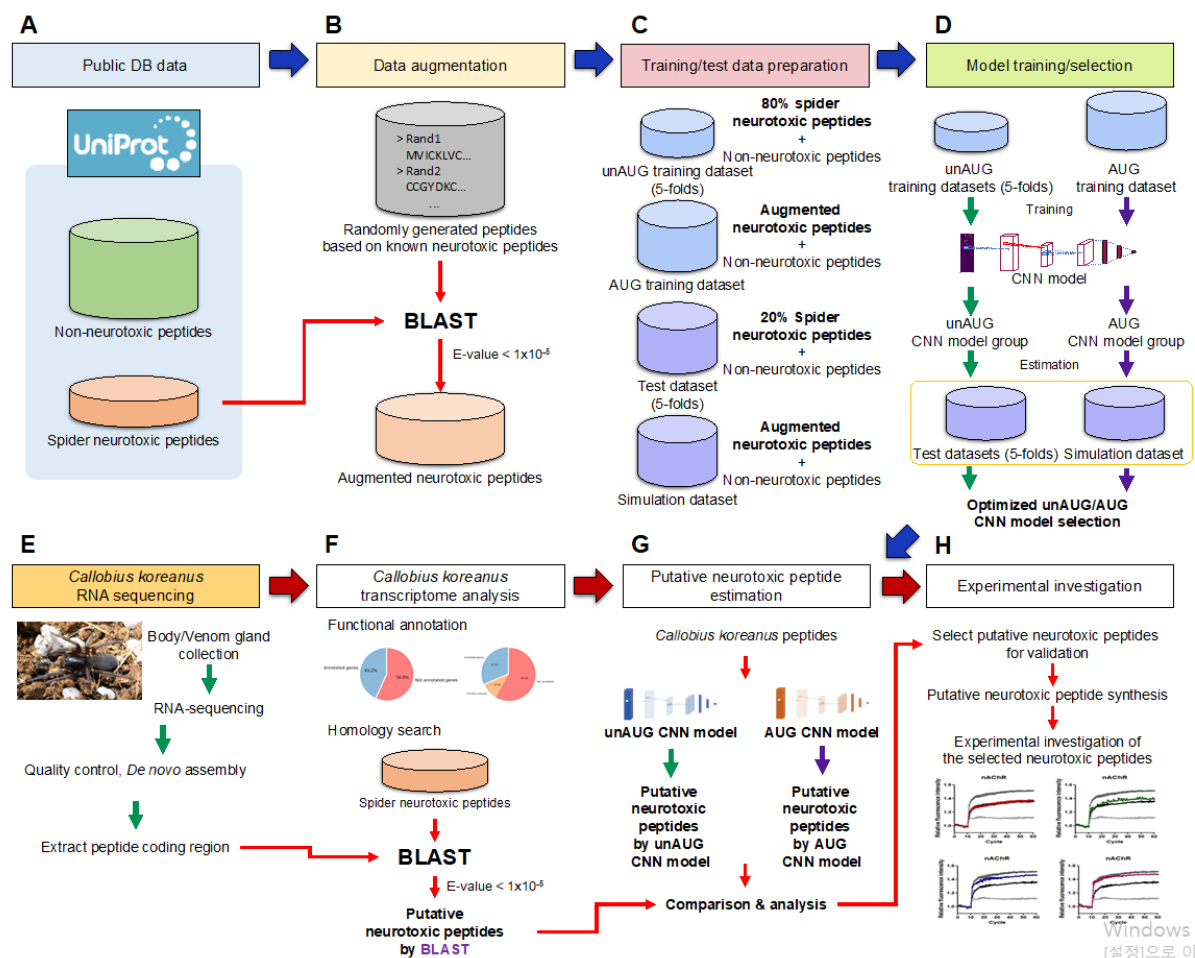

**Figure S1.** Research workflow. (A) Data for model training and test were obtained from UniProt. (B) Neurotoxic peptide data were augmented with the sequences that were randomly generated and filtered by BLAST search. (C) Two types for each training and test datasets were organized. Each AUG and unAUG training dataset only included known neurotoxic peptides or augmented neurotoxic peptides. (D) CNN models were trained by two types of training datasets, AUG and unAUG. Performance evaluation was conducted with test and simulation datasets. The optimized CNN models from each model group were selected by F1 score of the simulation dataset. (E) The venom glands of *C. koreanus* were separated from the body, and transcriptome data were generated from these samples. Peptide coding regions were found from the transcriptome. (F) Analyses in search of differentially expressed genes (DEG), functional annotation, and homology were performed using the transcriptome data. BLAST was used for screening of putative neurotoxic peptides from *C. koreanus*. (G) We estimated neurotoxic peptides using two of the selected AUG and unAUG CNN models. These peptides were compared with the BLAST result. (H) Four putative peptides were selected and investigated of the modulatory effect on ion channels.

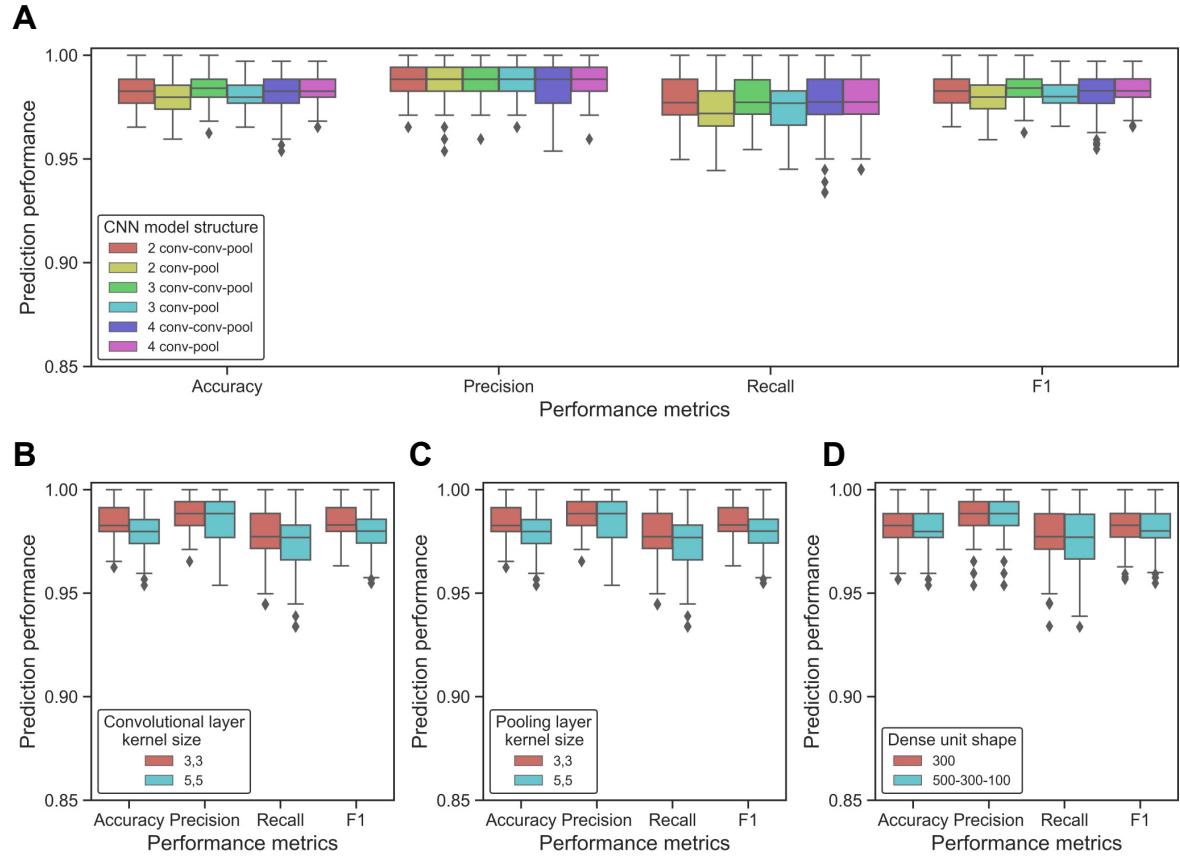

**Figure S2.** Prediction results from the unAUG CNN model with the test data. (A) Boxplots showing prediction performance comparison according to model structure, (B) convolutional layer kernel size, (C) pooling layer kernel size, and (D) dense layer unit shape.

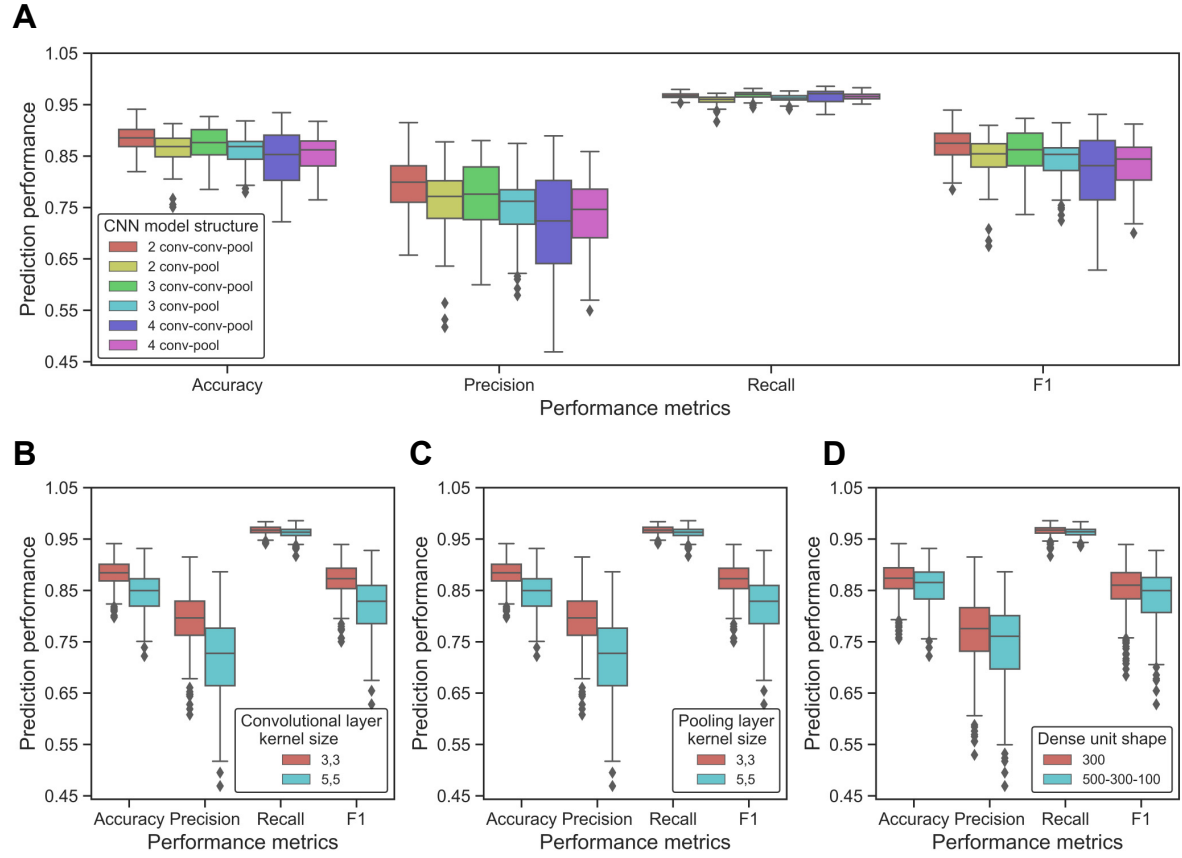

**Figure S3.** Prediction results from the unAUG CNN model with the simulation data. (A) Boxplots showing prediction performance comparison according to model structure, (B) convolutional layer kernel size, (C) pooling layer kernel size, and (D) dense layer unit shape.

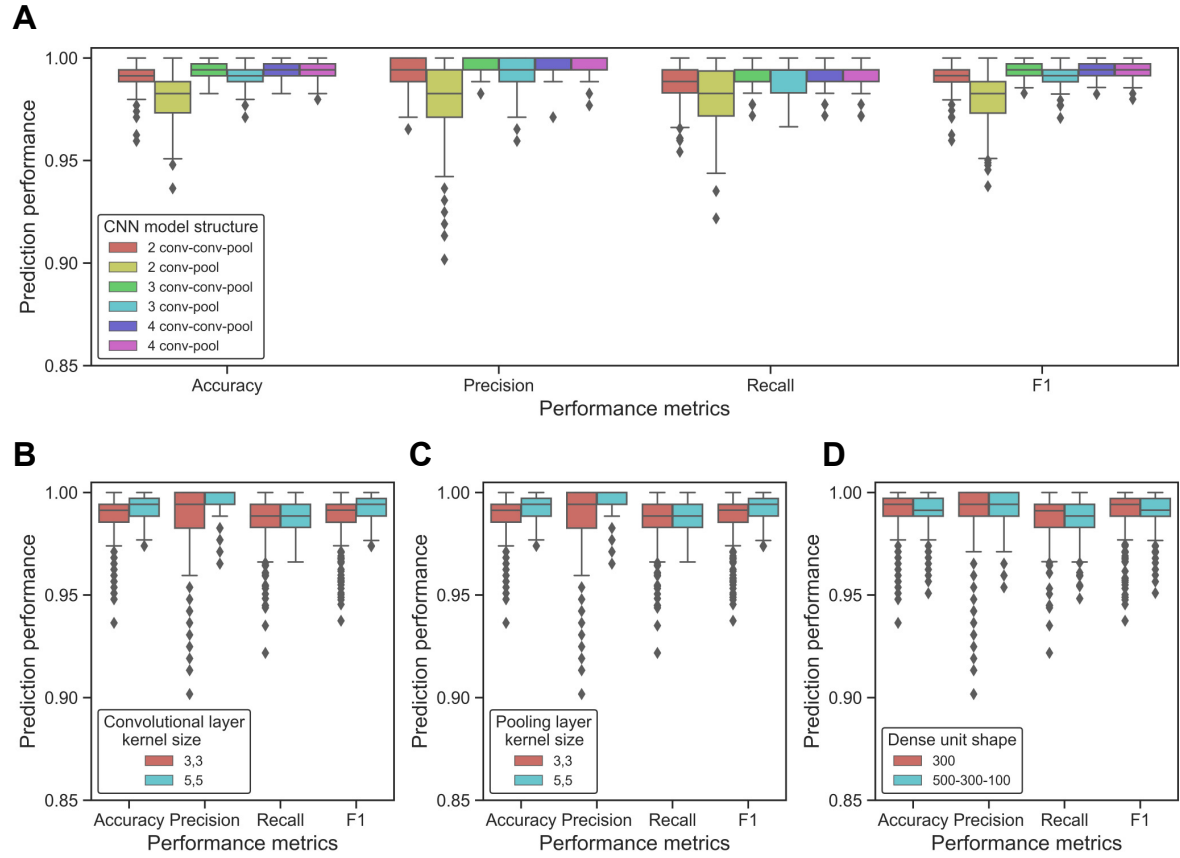

**Figure S4.** Prediction results from the AUG CNN model group with the test data. (A) Boxplots showing prediction performance comparison according to model structure, (B) convolutional layer kernel size, (C) pooling layer kernel size, and (D) dense layer unit shape.



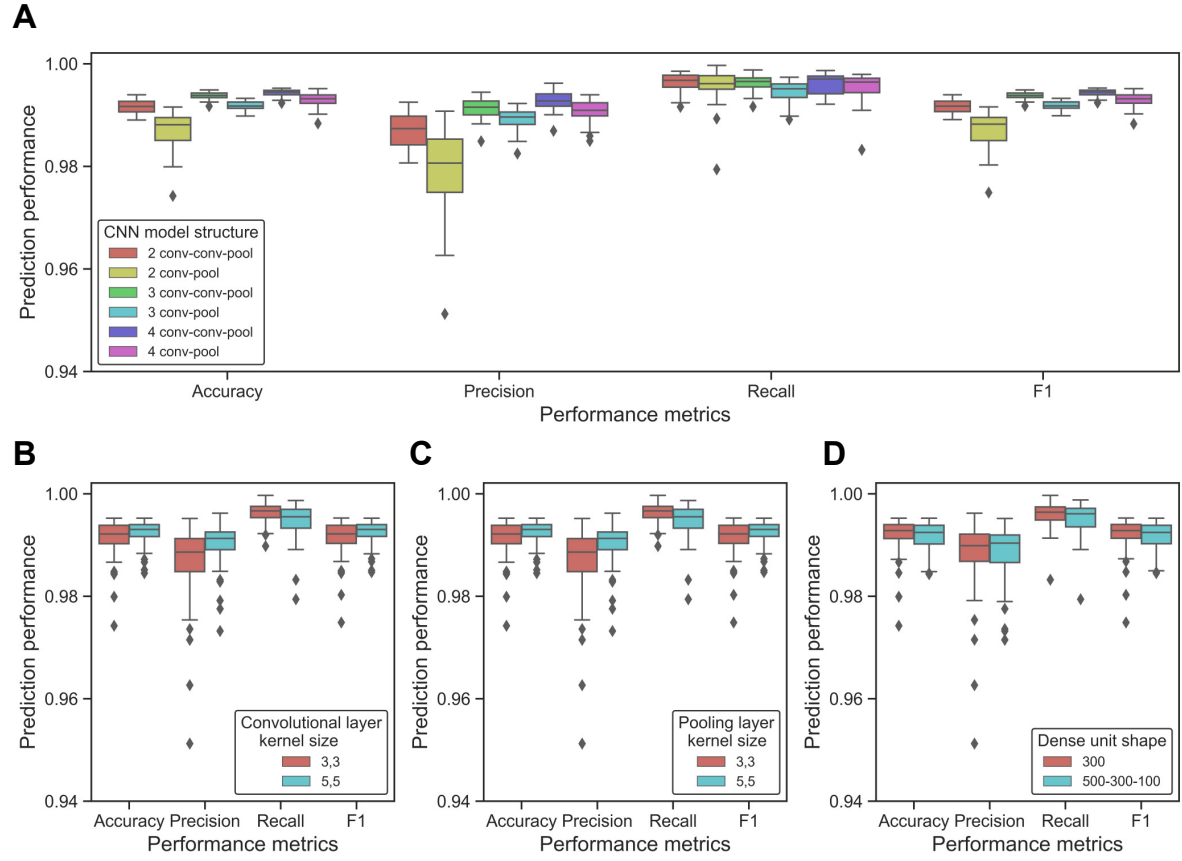

**Figure S5.** Prediction results from the AUG CNN model with the simulation data. (A) Boxplots showing prediction performance comparison according to model structure, (B) convolutional layer kernel size, (C) pooling layer kernel size, and (D) dense layer unit shape.

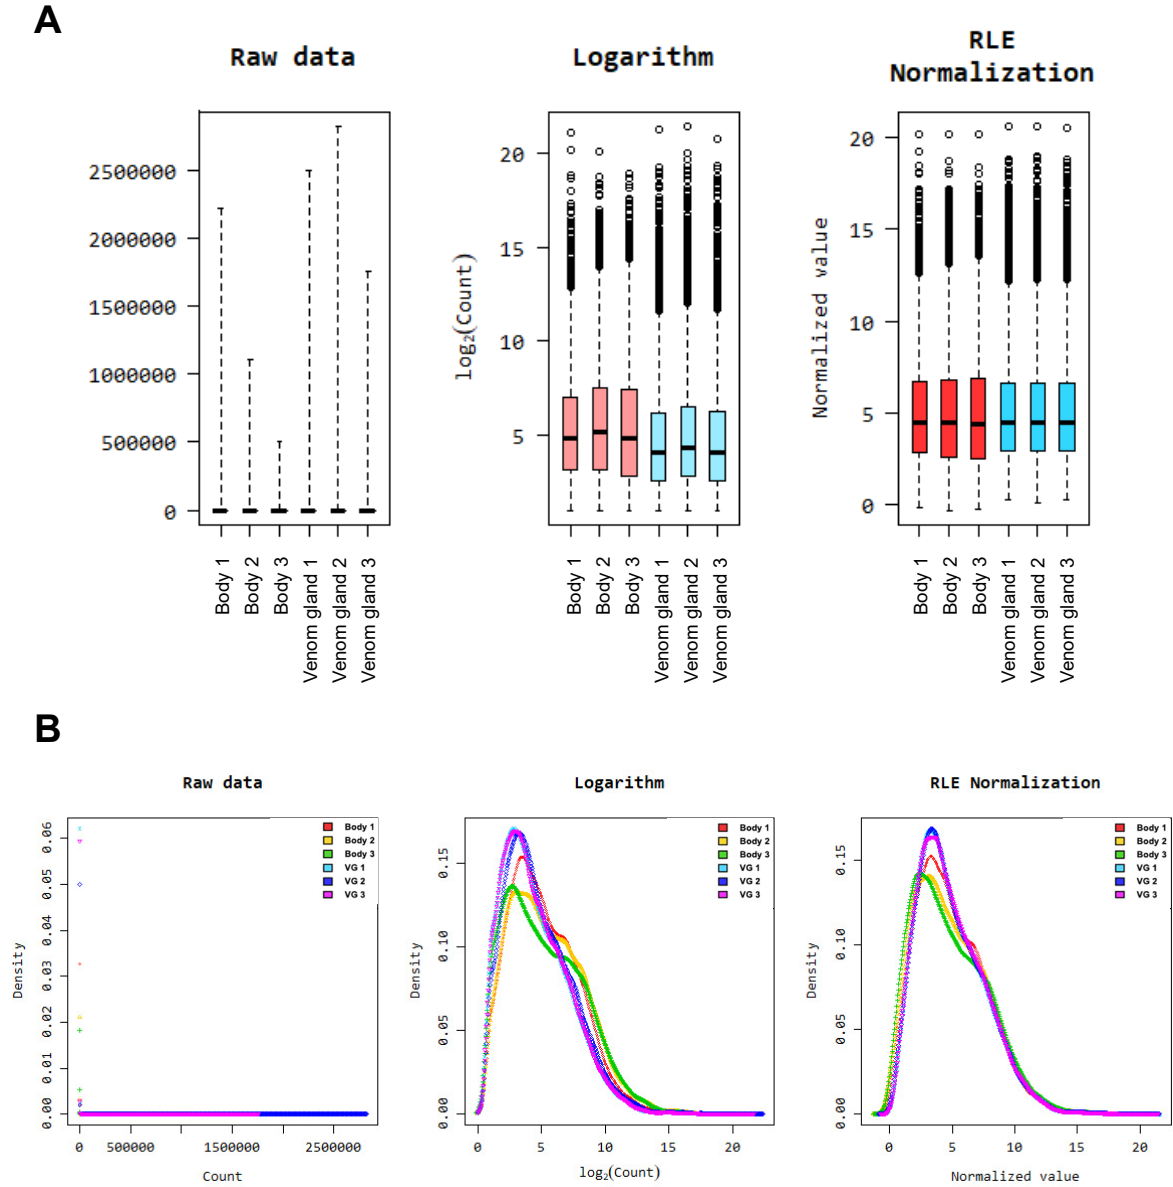

**Figure S6.** Preprocessing of *C. koreanus* transcriptome data. (A) The distribution of the transcriptome data before and after adjusting for batch effects. *C. koreanus* transcriptome read counts of raw data, log scaled, and relative log expression (RLE) normalization were shown in boxplots. (B) Density plots showing *C. koreanus* transcriptome read counts of raw data, log scaled, and RLE normalization.

**A**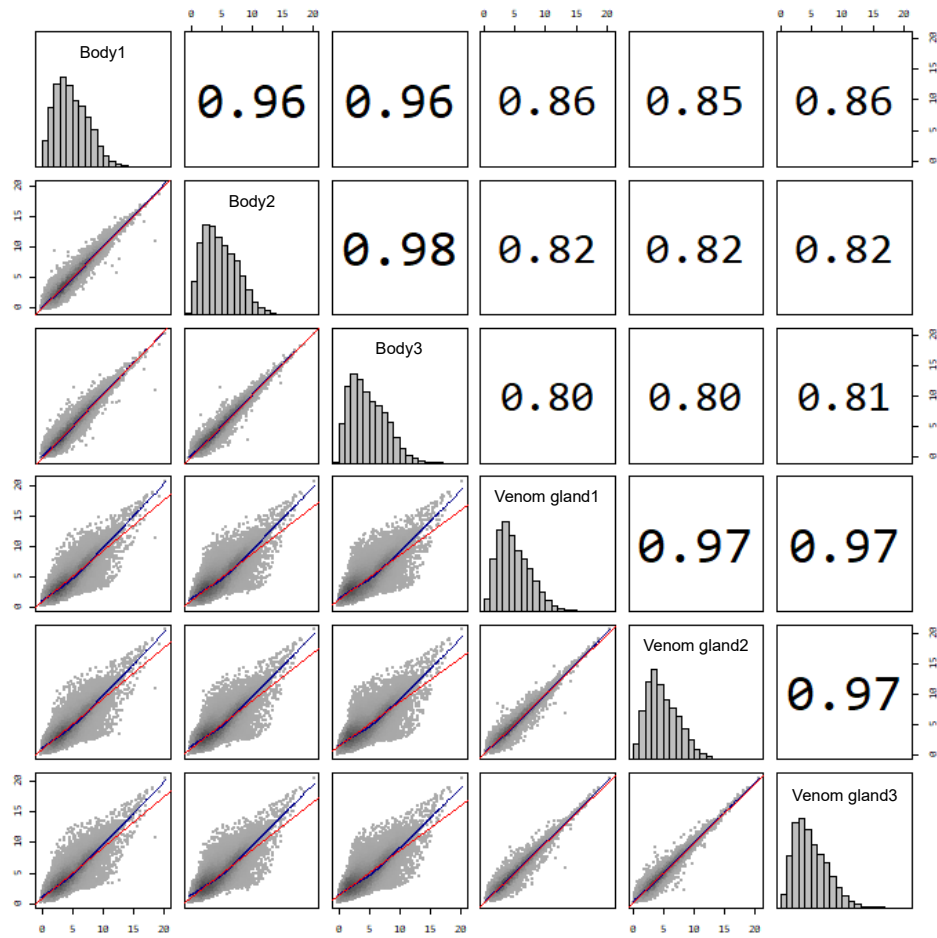**B**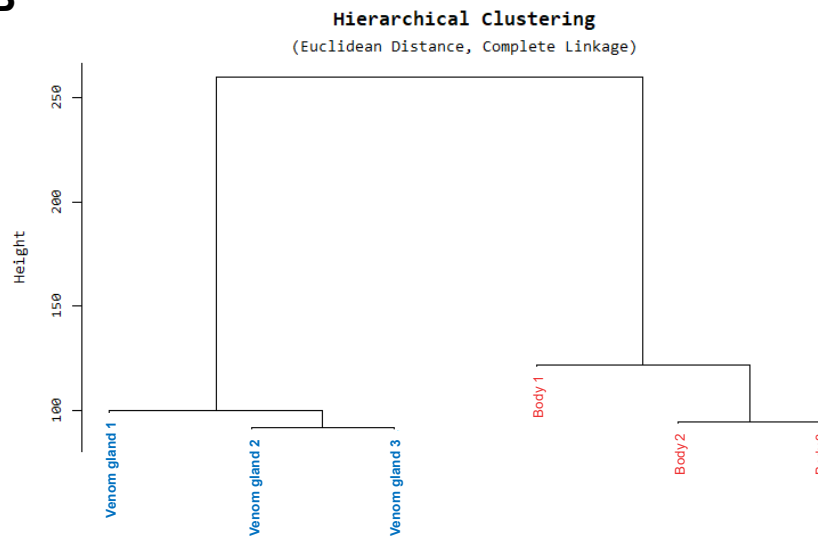

**Figure S7.** Reproducibility among *C. koreanus* samples. (A) Sample reproducibility was checked by scatterplots, Pearson correlation, and density of each pair of samples. Each information was shown on lower triangular, upper triangular, and diagonal, respectively. (B) A sample dendrogram showing hierarchical clustering of each sample.

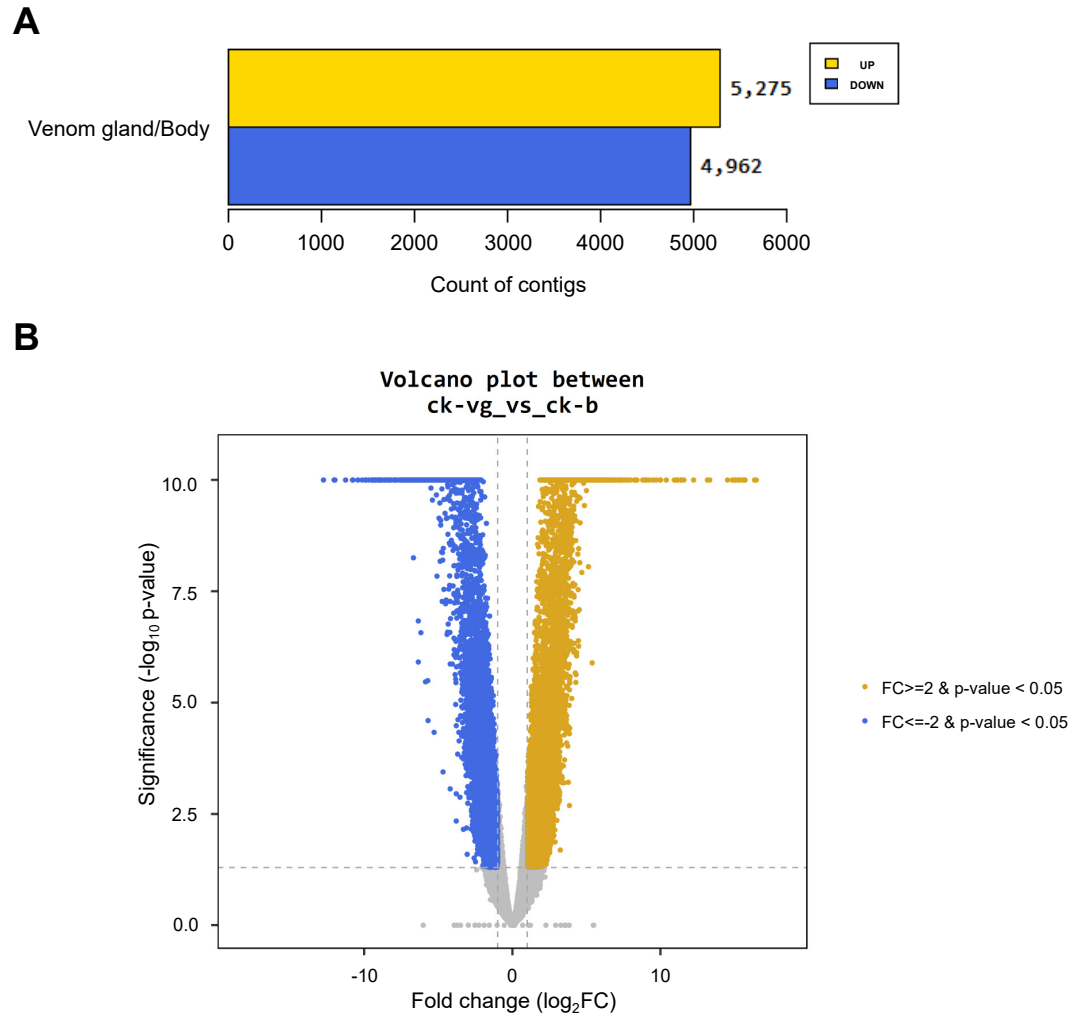

**Figure S8.** DEG analysis of *C. koreanus* transcriptome data. (A) Significant up and down contigs with criteria  $|\text{fold change}| \geq 2$  and  $P\text{-value} < 0.05$  were shown. (B) A volcano plot highlighting significant contigs.

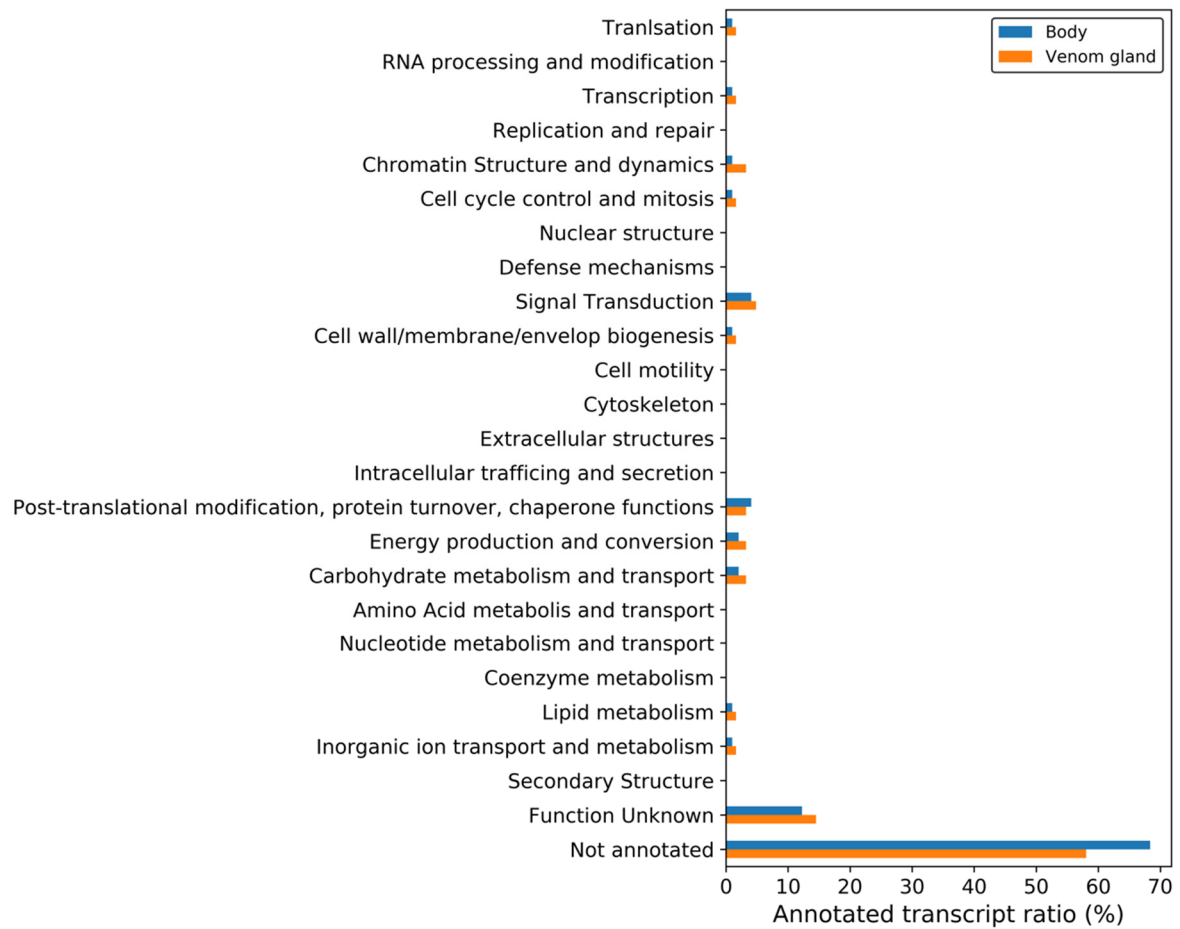

**Figure S9.** Functional annotation of the clusters of orthologous groups (COGs) from *C. koreanus* peptide-coding genes.

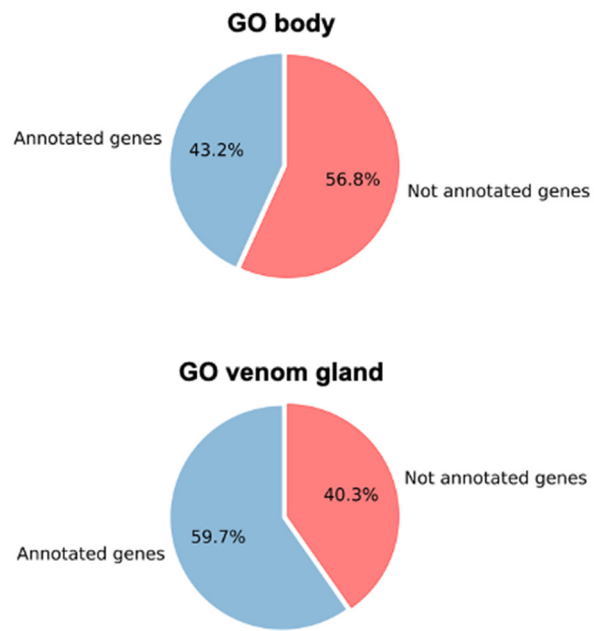

**Figure S10.** Functional annotation of gene ontology (GO) from *C. koreanus* peptide-coding genes. The annotation results of GO from the body (top) and the venom gland (bottom) were shown.

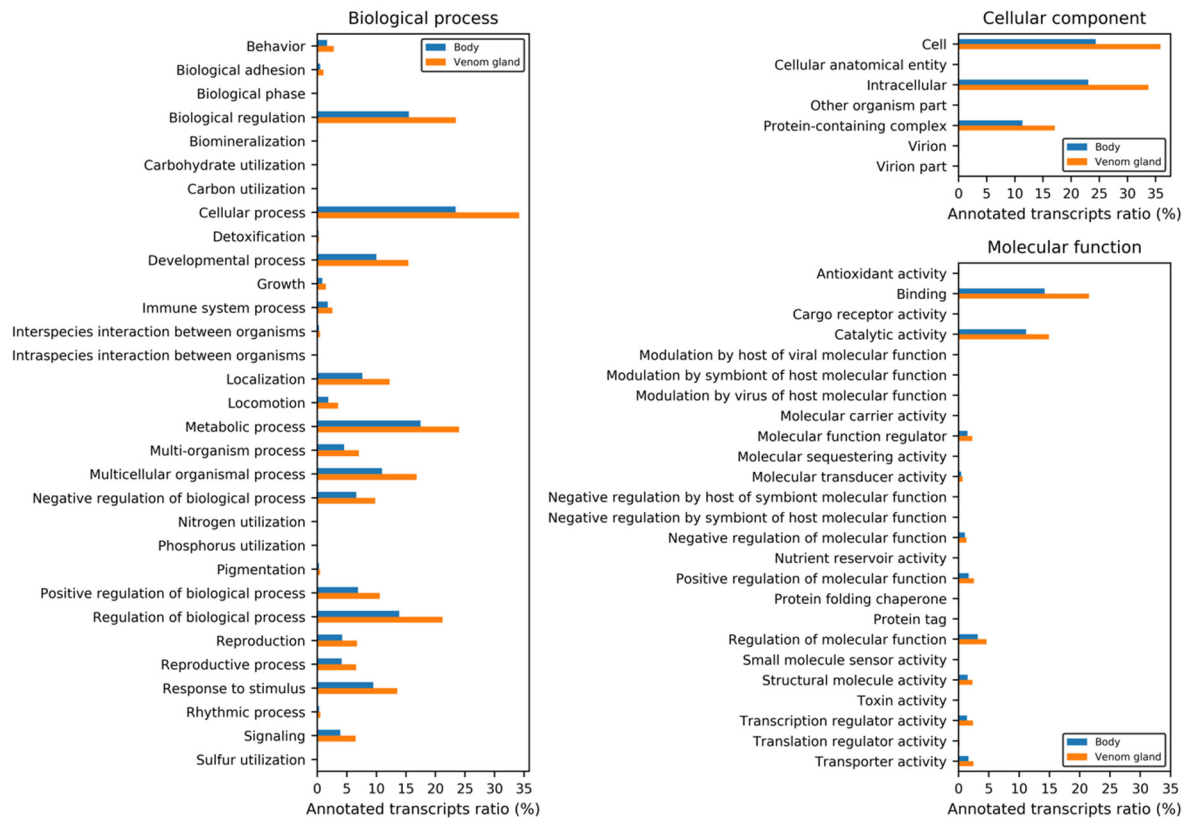

**Figure S11.** Distribution of the level-2 GO terms of *C. koreanus* peptide-coding genes. Annotation results of GO terms (Level 2) from the body and venom gland were shown with an annotated transcripts ratio.

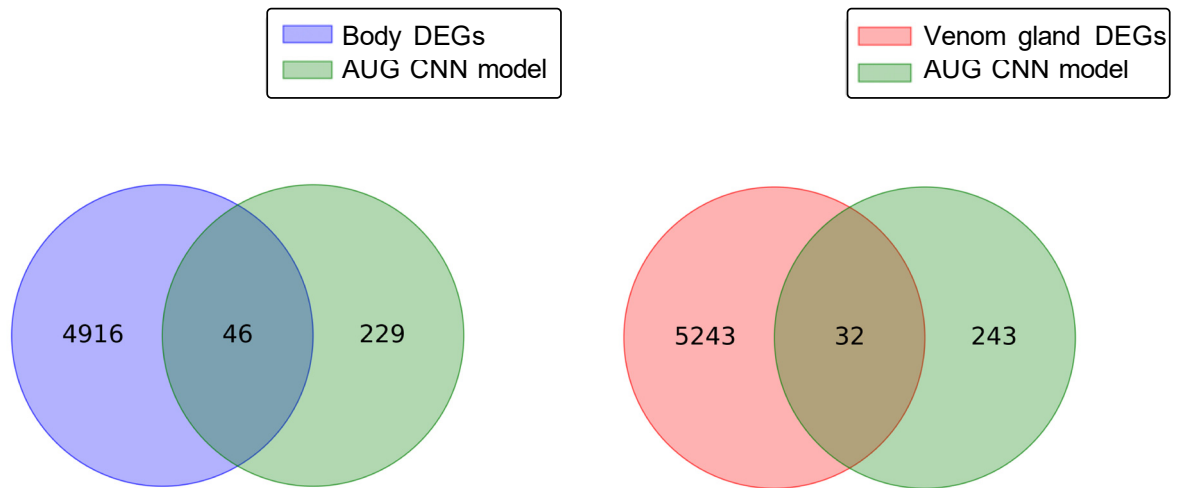

**Figure S12.** Comparison of *C. koreanus* transcriptome between the DEGs and prediction results from the AUG CNN model. Estimated neurotoxic peptides by the AUG model were presented along with the DEG results of body (left) and venom gland (right).



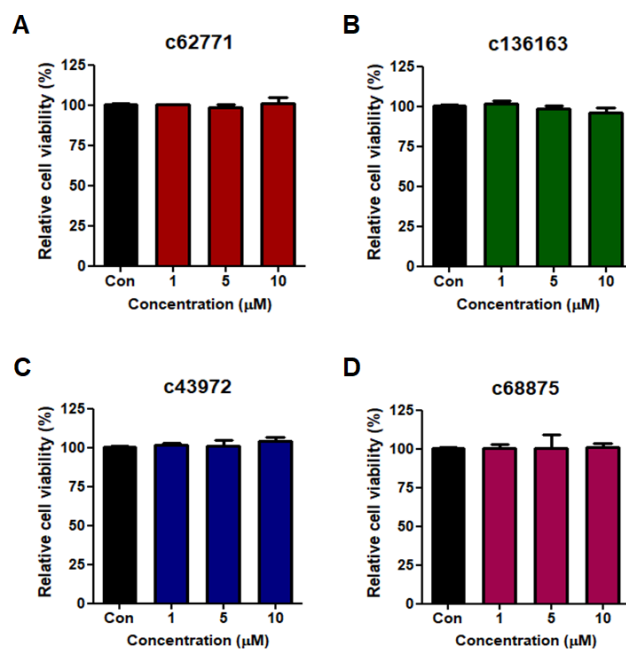

**Figure S13.** Evaluation of cytotoxicity of the peptides against human neuroblastoma cell line. Treatment of peptides (A) c62771, (B) c136163, (C) C43972, and (D) c68875 had no significant effect on SH-SY5Y cell viability at the concentration of 1, 5, 10  $\mu\text{M}$ .
